# Supplementary material for: Polypharmacy and effects of apixaban versus warfarin in patients with atrial fibrillation: post hoc analysis of the ARISTOTLE trial
Source: PubMed Central journal article supplement — BMJ. 2016 Jun 15;353:i2868. doi: 10.1136/bmj.i2868 (PMC4908974; doi:10.1136/bmj.i2868), 2016-06-15
Supplement: focj031222.ww_default.pdf [file focj031222.ww_default.pdf]

Web appendix: Supplementary materials

Supplementary Figure 1

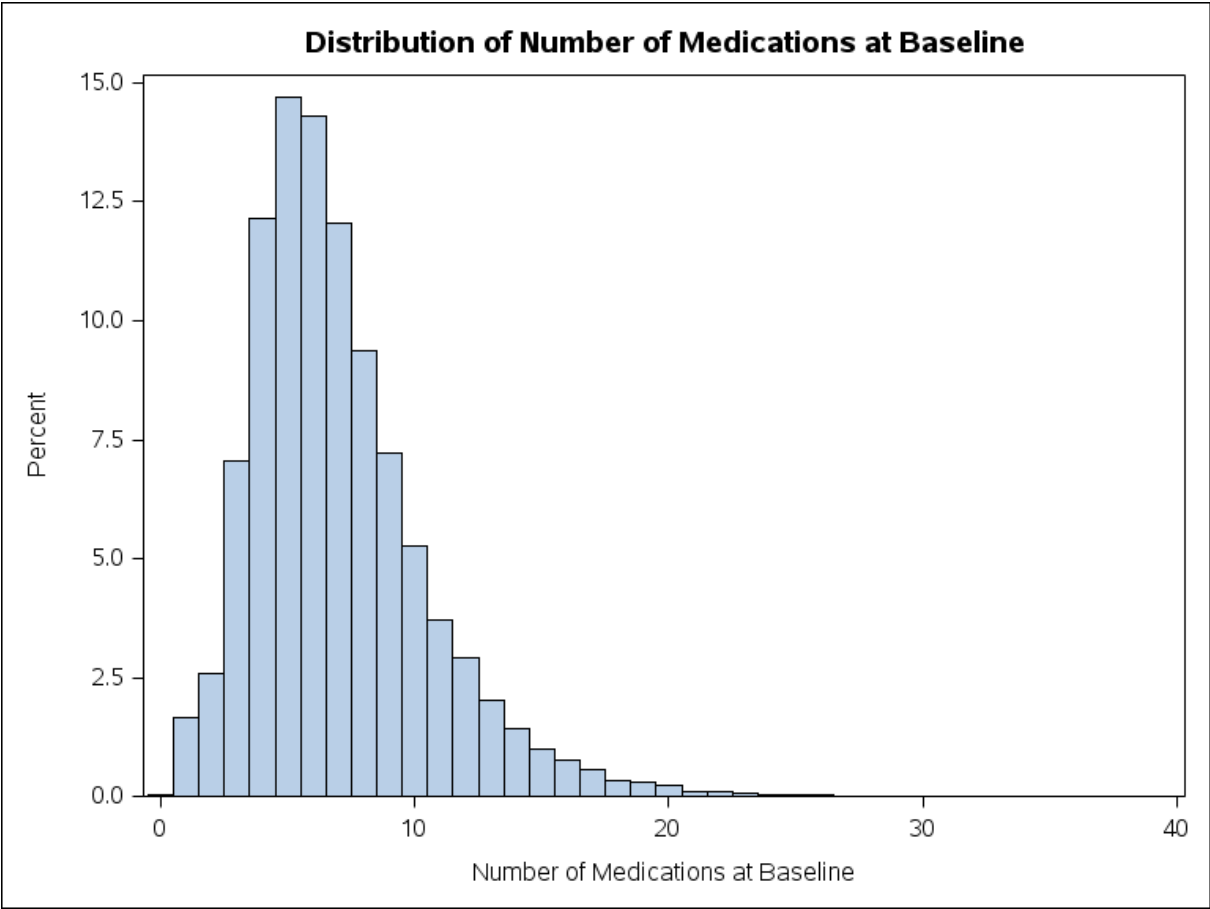

Supplementary figure 1. Distribution of number of medications at baseline.

**Supplementary Table 1. Baseline characteristics by number of baseline concomitant medications subcategorized by treatment allocation**

| Characteristic                                          | 0-5 Meds          |                   | 6-8 Meds          |                   | 9 or More Meds    |                   |
|---------------------------------------------------------|-------------------|-------------------|-------------------|-------------------|-------------------|-------------------|
|                                                         | Apixaban (N=3424) | Warfarin (N=3519) | Apixaban (N=3320) | Warfarin (N=3182) | Apixaban (N=2376) | Warfarin (N=2380) |
| Age, mean (SD), yrs                                     | 68, (10)          | 68, (10)          | 69, (9)           | 69, (10)          | 71, (9)           | 71, (9)           |
| Male, no, (%)                                           | 2320 (67.8%)      | 2367 (67.3%)      | 2076 (62.5%)      | 2031 (63.8%)      | 1490 (62.7%)      | 1501 (63.1%)      |
| Weight, mean (SD), kg                                   | 81, (19)          | 81, (18)          | 84, (21)          | 84, (21)          | 89, (23)          | 89, (23)          |
| Body mass index, mean (SD), kg/m <sup>2</sup>           | 28.2, (5.3)       | 28.3, (5.4)       | 29.4, (6.0)       | 29.6, (6.1)       | 30.7, (6.5)       | 30.8, (6.6)       |
| Prior use of Vitamin K antagonists for >30 days, no (%) | 1759 (51.4%)      | 1796 (51.0%)      | 1852 (55.8%)      | 1804 (56.7%)      | 1597 (67.2%)      | 1593 (66.9%)      |
| Creatinine, mean (SD)                                   | 1.01, (0.24)      | 1.02, (0.25)      | 1.06, (0.28)      | 1.06, (0.28)      | 1.12, (0.32)      | 1.12, (0.32)      |
| Region of enrollment, no. (%)                           |                   |                   |                   |                   |                   |                   |
| North America                                           | 362 (10.6%)       | 374 (10.6%)       | 702 (21.1%)       | 651 (20.5%)       | 1185 (49.9%)      | 1200 (50.4%)      |
| Latin America                                           | 905 (26.4%)       | 904 (25.7%)       | 670 (20.2%)       | 636 (20.0%)       | 168 (7.1%)        | 185 (7.8%)        |
| Europe                                                  | 1549 (45.2%)      | 1579 (44.9%)      | 1409 (42.4%)      | 1402 (44.1%)      | 714 (30.1%)       | 690 (29.0%)       |
| Asia                                                    | 608 (17.8%)       | 662 (18.8%)       | 539 (16.2%)       | 493 (15.5%)       | 309 (13.0%)       | 305 (12.8%)       |
| HAS-BLED score, mean (SD)                               | 1.46, (0.96)      | 1.45, (0.96)      | 1.78, (1.01)      | 1.76, (1.03)      | 2.23, (1.06)      | 2.27, (1.04)      |
| CHADS <sub>2</sub> score, mean (SD)                     | 1.87, (1.02)      | 1.88, (1.02)      | 2.15, (1.08)      | 2.14, (1.09)      | 2.41, (1.15)      | 2.46, (1.19)      |
| CHADS <sub>2</sub> score, no (%)                        |                   |                   |                   |                   |                   |                   |
| ≤1                                                      | 1533 (44.8%)      | 1560 (44.3%)      | 1037 (31.2%)      | 1020 (32.1%)      | 530 (22.3%)       | 503 (21.1%)       |
| 2                                                       | 1139 (33.3%)      | 1170 (33.2%)      | 1217 (36.7%)      | 1183 (37.2%)      | 906 (38.1%)       | 901 (37.9%)       |
| ≥3                                                      | 752 (22.0%)       | 789 (22.4%)       | 1066 (32.1%)      | 979 (30.8%)       | 940 (39.6%)       | 976 (41.0%)       |
| Low dose apixaban/placebo (2.5 mg bid) received         | 122 (3.6%)        | 131 (3.7%)        | 166 (5.0%)*       | 122 (3.8%)*       | 140 (5.9%)        | 150 (6.3%)        |
| <b>Comorbidities organized by organ system, no. (%)</b> |                   |                   |                   |                   |                   |                   |
| <b>Cardiovascular</b>                                   |                   |                   |                   |                   |                   |                   |
| CAD                                                     | 897 (26.2%)       | 898 (25.6%)       | 1118 (33.7%)      | 1066 (33.6%)      | 1032 (43.5%)      | 1031 (43.3%)      |
| Prior MI                                                | 295 (8.6%)        | 269 (7.7%)        | 501 (15.1%)       | 484 (15.2%)       | 523 (22.0%)       | 513 (21.6%)       |
| History of PCI/CABG                                     | 192 (5.6%)        | 177 (5.0%)        | 430 (13.0%)       | 385 (12.1%)       | 653 (27.5%)       | 639 (26.8%)       |
| Congestive Heart Failure within 3 Months                | 958 (28.0%)       | 973 (27.6%)       | 1127 (33.9%)      | 1067 (33.5%)      | 699 (29.4%)       | 717 (30.1%)       |
| At Least Moderate Valvular Heart Disease                | 458 (13.4%)       | 468 (13.3%)       | 611 (18.4%)       | 581 (18.3%)       | 560 (23.6%)       | 556 (23.4%)       |
| Syncope in Last 5 years                                 | 136 (4.0%)        | 122 (3.5%)        | 147 (4.4%)        | 132 (4.2%)        | 153 (6.4%)        | 169 (7.1%)        |
| Hypertension with Pharmacological Treatment             | 2893 (84.5%)      | 2951 (83.9%)      | 2941 (88.6%)      | 2821 (88.7%)      | 2128 (89.6%)*     | 2182 (91.7%)*     |
| PAD                                                     | 88 (2.6%)         | 105 (3.0%)        | 150 (4.6%)        | 140 (4.4%)        | 204 (8.7%)        | 197 (8.4%)        |
| Aortic Aneurysm                                         | 26 (0.8%)         | 20 (0.6%)         | 50 (1.5%)         | 34 (1.1%)         | 65 (2.8%)         | 74 (3.1%)         |
| <b>Neurological/Cerebrovascular</b>                     |                   |                   |                   |                   |                   |                   |
| Carotid Stenosis                                        | 29 (0.8%)         | 25 (0.7%)         | 48 (1.4%)         | 45 (1.4%)         | 103 (4.3%)        | 87 (3.7%)         |
| TIA                                                     | 138 (4.0%)        | 164 (4.7%)        | 164 (4.9%)        | 151 (4.7%)        | 158 (6.7%)        | 179 (7.5%)        |
| Stroke                                                  | 383 (11.2%)       | 425 (12.1%)       | 385 (11.6%)       | 365 (11.5%)       | 277 (11.7%)       | 292 (12.3%)       |
| Dementia                                                | 10 (0.3%)         | 12 (0.4%)         | 18 (0.6%)         | 11 (0.4%)         | 21 (0.9%)         | 24 (1.1%)         |
| Epilepsy                                                | 10 (0.3%)         | 12 (0.4%)         | 22 (0.7%)         | 27 (0.9%)         | 21 (0.9%)         | 20 (0.9%)         |

**Supplementary Table 1. Baseline characteristics by number of baseline concomitant medications subcategorized by treatment allocation**

| Characteristic                                              | 0-5 Meds          |                   | 6-8 Meds          |                   | 9 or More Meds    |                   |
|-------------------------------------------------------------|-------------------|-------------------|-------------------|-------------------|-------------------|-------------------|
|                                                             | Apixaban (N=3424) | Warfarin (N=3519) | Apixaban (N=3320) | Warfarin (N=3182) | Apixaban (N=2376) | Warfarin (N=2380) |
| <b>Pulmonary</b>                                            |                   |                   |                   |                   |                   |                   |
| COPD                                                        | 211 (6.2%)        | 224 (6.4%)        | 317 (9.6%)        | 309 (9.8%)        | 442 (18.6%)       | 447 (18.8%)       |
| Asthma                                                      | 77 (2.3%)         | 80 (2.3%)         | 122 (3.7%)        | 128 (4.0%)        | 211 (8.9%)        | 251 (10.6%)       |
| Sleep Apnea                                                 | 72 (2.1%)         | 73 (2.1%)         | 138 (4.2%)        | 124 (3.9%)        | 310 (13.1%)       | 296 (12.5%)       |
| <b>Gastrointestinal</b>                                     |                   |                   |                   |                   |                   |                   |
| Dyspepsia                                                   | 193 (5.6%)        | 181 (5.2%)        | 229 (6.9%)        | 216 (6.8%)        | 272 (11.5%)       | 284 (11.9%)       |
| GE Reflux Disease                                           | 164 (4.8%)        | 151 (4.3%)        | 253 (7.7%)        | 274 (8.6%)        | 540 (22.8%)       | 534 (22.5%)       |
| Peptic Ulcer Disease                                        | 193 (5.6%)        | 190 (5.4%)        | 211 (6.4%)        | 206 (6.5%)        | 210 (8.8%)        | 196 (8.2%)        |
| GI Surgery                                                  | 246 (7.2%)        | 263 (7.5%)        | 316 (9.5%)        | 290 (9.1%)        | 298 (12.5%)       | 277 (11.7%)       |
| Chronic Liver Disease                                       | 94 (2.7%)         | 96 (2.7%)         | 106 (3.2%)        | 87 (2.7%)         | 65 (2.7%)         | 56 (2.4%)         |
| <b>Endocrine</b>                                            |                   |                   |                   |                   |                   |                   |
| Hypo/Hyperthyroidism                                        | 210 (6.2%)        | 219 (6.2%)        | 389 (11.7%)       | 344 (10.8%)       | 450 (19.0%)       | 428 (18.0%)       |
| Diabetes                                                    | 403 (11.8%)       | 403 (11.5%)       | 827 (24.9%)       | 776 (24.4%)       | 1054 (44.4%)      | 1084 (45.5%)      |
| End organ Damage due to DM                                  | 32 (0.9%)         | 43 (1.2%)         | 108 (3.3%)        | 111 (3.5%)        | 229 (9.7%)        | 230 (9.7%)        |
| <b>Musculoskeletal</b>                                      |                   |                   |                   |                   |                   |                   |
| Falls within 1 year                                         | 81 (2.7%)*        | 59 (1.9%)*        | 96 (3.2%)         | 119 (4.1%)        | 209 (9.3%)        | 189 (8.4%)        |
| Previous Non-Traumatic Fracture                             | 147 (4.3%)        | 152 (4.3%)        | 171 (5.2%)        | 168 (5.3%)        | 229 (9.7%)        | 207 (8.7%)        |
| Osteoporosis                                                | 75 (2.2%)         | 76 (2.2%)         | 146 (4.4%)        | 152 (4.8%)        | 266 (11.2%)       | 255 (10.7%)       |
| <b>Renal</b>                                                |                   |                   |                   |                   |                   |                   |
| Chronic Kidney Disease                                      | 218 (6.4%)        | 216 (6.1%)        | 260 (7.8%)        | 260 (8.2%)        | 270 (11.4%)       | 283 (11.9%)       |
| Creatine Clearance < 50 mL/min                              | 444 (13.0%)       | 483 (13.8%)       | 573 (17.3%)       | 539 (17.0%)       | 479 (20.2%)       | 491 (20.7%)       |
| <b>Hematological</b>                                        |                   |                   |                   |                   |                   |                   |
| History of Anemia                                           | 97 (2.8%)         | 113 (3.2%)        | 199 (6.0%)        | 160 (5.0%)        | 354 (14.9%)       | 322 (13.5%)       |
| Thrombocytopenia (platelet at baseline < 150)               | 261 (7.8%)        | 249 (7.3%)        | 245 (7.6%)        | 222 (7.1%)        | 177 (7.7%)        | 155 (6.7%)        |
| Bleeding History                                            | 392 (11.4%)       | 387 (11.0%)       | 543 (16.4%)       | 486 (15.3%)       | 590 (24.8%)       | 642 (27.0%)       |
|                                                             |                   |                   |                   |                   |                   |                   |
| <b>Number of organ systems affected (median, 25th-75th)</b> | 2, 1-3            | 2, 1-3            | 2, 2-3            | 2, 2-3            | 3, 2-4            | 3, 3-4            |

\*P-value<0.05 between apixaban and warfarin allocation;

Abbreviations: n = number of patients, sd = standard deviation, yrs = years, no = number, kg = kilogram, m = meter, CAD = coronary artery disease, MI = myocardial infarction, PCI = percutaneous coronary intervention, CABG = coronary artery bypass grafting, PAD = peripheral artery disease, TIA = transient ischemic attack, COPD = chronic obstructive pulmonary disease, GE = gastroesophageal reflux disease, GI = gastrointestinal, DM = diabetes mellitus, mL = milliliter, min = minute.

**Supplementary Table 2A. Distribution of Drug Classes by Number of Medications Used – U.S. Patients**

| Drug Class                                                                                                                                                                                | Number of Medications |             |             |                    | p-value |
|-------------------------------------------------------------------------------------------------------------------------------------------------------------------------------------------|-----------------------|-------------|-------------|--------------------|---------|
|                                                                                                                                                                                           | All (N=3417)          | 0-5 (N=467) | 6-8 (N=970) | 9 or more (N=1980) |         |
| A. Alimentary tract and metabolism                                                                                                                                                        | 2508 (73%)            | 100 (21.4%) | 603 (62.2%) | 1805 (91.2%)       | <.0001  |
| B. Blood and blood forming organs [excluding apixaban/warfarin]                                                                                                                           | 2722 (80%)            | 209 (44.8%) | 720 (74.2%) | 1793 (90.6%)       | <.0001  |
| C. Cardiovascular system                                                                                                                                                                  | 3323 (97%)            | 400 (85.7%) | 956 (98.6%) | 1967 (99.3%)       | <.0001  |
| D. Dermatologicals                                                                                                                                                                        | 270 (8%)              | 8 (1.7%)    | 44 (4.5%)   | 218 (11.0%)        | <.0001  |
| G. Genito-urinary system and sex hormones                                                                                                                                                 | 717 (21%)             | 29 (6.2%)   | 146 (15.1%) | 542 (27.4%)        | <.0001  |
| H. Systemic hormonal preparations, excluding sex hormones and insulins                                                                                                                    | 528 (15%)             | 19 (4.1%)   | 87 (9.0%)   | 422 (21.3%)        | <.0001  |
| J. Antiinfectives for systemic use                                                                                                                                                        | 214 (6%)              | 3 (0.6%)    | 36 (3.7%)   | 175 (8.8%)         | <.0001  |
| L. Antineoplastic and immunomodulating agents                                                                                                                                             | 95 (3%)               | 4 (0.9%)    | 18 (1.9%)   | 73 (3.7%)          | 0.0004  |
| M. Musculo-skeletal system                                                                                                                                                                | 824 (24%)             | 18 (3.9%)   | 154 (15.9%) | 652 (32.9%)        | <.0001  |
| N. Nervous system                                                                                                                                                                         | 1529 (45%)            | 63 (13.5%)  | 340 (35.1%) | 1126 (56.9%)       | <.0001  |
| P. Antiparasitic products, insecticides and repellents                                                                                                                                    | 20 (0.6%)             | 0 (0.0%)    | 1 (0.1%)    | 19 (1.0%)          | 0.0034  |
| R. Respiratory system                                                                                                                                                                     | 850 (25%)             | 19 (4.1%)   | 145 (14.9%) | 686 (34.6%)        | <.0001  |
| S. Sensory organs                                                                                                                                                                         | 207 (6%)              | 4 (0.9%)    | 34 (3.5%)   | 169 (8.5%)         | <.0001  |
| V. Various                                                                                                                                                                                | 400 (12%)             | 10 (2.1%)   | 52 (5.4%)   | 338 (17.1%)        | <.0001  |
| <b>Interacting drugs</b>                                                                                                                                                                  |                       |             |             |                    |         |
| ≥1 combined PGP and weak-moderate-strong CYP3A4 inhibitor                                                                                                                                 | 913 (26.7%)           | 87 (18.6%)  | 244 (25.2%) | 582 (29.4%)        | <.0001  |
| ≥1 combined PGP and weak-moderate-strong CYP3A4 inducer                                                                                                                                   | 12 (0.4%)             | 1 (0.2%)    | 4 (0.4%)    | 7 (0.4%)           | 0.9     |
| ≥1 highly probable VKA inhibiting drug                                                                                                                                                    | 24 (0.7%)             | 1 (0.2%)    | 6 (0.6%)    | 17 (0.9%)          | 0.3     |
| ≥1 highly probable VKA potentiating drug                                                                                                                                                  | 772 (22.6%)           | 45 (9.6%)   | 167 (17.2%) | 560 (28.3%)        | <.0001  |
| Use of ASA,NSAIDs and/or Prednisone                                                                                                                                                       | 1555 (45.5%)          | 91 (19.5%)  | 371 (38.2%) | 1093 (55.2%)       | <.0001  |
| Abbreviations: n = number of patients, PGP = P-Glycoprotein, CYP = Cytochrome P450, VKA = vitamin K antagonist, ASA = acetylsalicylic acid, NSAID = non-steroidal anti-inflammatory drug. |                       |             |             |                    |         |

**Supplementary table 2B. Distribution of Drug Classes by Number of Medications Used - non-U.S. Patients**

| Drug Class                                                                                                                                                                                | Number of Medications |                 |                 |                       | p-value |
|-------------------------------------------------------------------------------------------------------------------------------------------------------------------------------------------|-----------------------|-----------------|-----------------|-----------------------|---------|
|                                                                                                                                                                                           | All<br>(N=14784)      | 0-5<br>(N=6476) | 6-8<br>(N=5532) | 9 or more<br>(N=2776) |         |
| A. Alimentary tract and metabolism                                                                                                                                                        | 5593 (38%)            | 862 (13.3%)     | 2442 (44.1%)    | 2289 (82.5%)          | <.0001  |
| B. Blood and blood forming organs [excluding apixaban/warfarin]                                                                                                                           | 7998 (54%)            | 2073 (32.0%)    | 3602 (65.1%)    | 2323 (83.7%)          | <.0001  |
| C. Cardiovascular system                                                                                                                                                                  | 14342 (97%)           | 6060 (93.6%)    | 5512 (99.6%)    | 2770 (99.8%)          | <.0001  |
| D. Dermatologicals                                                                                                                                                                        | 206 (1.4%)            | 26 (0.4%)       | 52 (0.9%)       | 128 (4.6%)            | <.0001  |
| G. Genito-urinary system and sex hormones                                                                                                                                                 | 902 (6%)              | 144 (2.2%)      | 364 (6.6%)      | 394 (14.2%)           | <.0001  |
| H. Systemic hormonal preparations, excluding sex hormones and insulins                                                                                                                    | 1013 (7%)             | 162 (2.5%)      | 421 (7.6%)      | 430 (15.5%)           | <.0001  |
| J. Antiinfectives for systemic use                                                                                                                                                        | 338 (2%)              | 41 (0.6%)       | 125 (2.3%)      | 172 (6.2%)            | <.0001  |
| L. Antineoplastic and immunomodulating agents                                                                                                                                             | 131 (0.9%)            | 10 (0.2%)       | 42 (0.8%)       | 79 (2.8%)             | <.0001  |
| M. Musculo-skeletal system                                                                                                                                                                | 1416 (10%)            | 184 (2.8%)      | 534 (9.7%)      | 698 (25.1%)           | <.0001  |
| N. Nervous system                                                                                                                                                                         | 2818 (19%)            | 460 (7.1%)      | 1108 (20.0%)    | 1250 (45.0%)          | <.0001  |
| P. Antiparasitic products, insecticides and repellents                                                                                                                                    | 39 (0.3%)             | 0 (0.0%)        | 12 (0.2%)       | 27 (1.0%)             | <.0001  |
| R. Respiratory system                                                                                                                                                                     | 1250 (8%)             | 145 (2.2%)      | 455 (8.2%)      | 650 (23.4%)           | <.0001  |
| S. Sensory organs                                                                                                                                                                         | 249 (1.7%)            | 37 (0.6%)       | 81 (1.5%)       | 131 (4.7%)            | <.0001  |
| V. Various                                                                                                                                                                                | 603 (4%)              | 116 (1.8%)      | 195 (3.5%)      | 292 (10.5%)           | <.0001  |
| <b>Interacting drugs</b>                                                                                                                                                                  |                       |                 |                 |                       |         |
| ≥1 combined PGP and weak-moderate-strong CYP3A4 inhibitor                                                                                                                                 | 2947 (19.9%)          | 1041 (16.1%)    | 1187 (21.5%)    | 719 (25.9%)           | <.0001  |
| ≥1 combined PGP and weak-moderate-strong CYP3A4 inducer                                                                                                                                   | 81 (0.5%)             | 11 (0.2%)       | 30 (0.5%)       | 40 (1.4%)             | <.0001  |
| ≥1 highly probable VKA inhibiting drug                                                                                                                                                    | 36 (0.2%)             | 7 (0.1%)        | 13 (0.2%)       | 16 (0.6%)             | 0.0002  |
| ≥1 highly probable VKA potentiating drug                                                                                                                                                  | 2994 (20.3%)          | 928 (14.3%)     | 1239 (22.4%)    | 827 (29.8%)           | <.0001  |
| Use of ASA,NSAIDs and/or Prednisone                                                                                                                                                       | 3827 (25.9%)          | 865 (13.4%)     | 1693 (30.6%)    | 1269 (45.7%)          | <.0001  |
| Abbreviations: n = number of patients, PGP = P-Glycoprotein, CYP = Cytochrome P450, VKA = vitamin K antagonist, ASA = acetylsalicylic acid, NSAID = non-steroidal anti-inflammatory drug. |                       |                 |                 |                       |         |
